# Supplementary material for: Generation of knock-in lampreys by CRISPR-Cas9-mediated genome engineering
Source: PubMed Central journal article supplement (PMC8494898; doi:10.1038/s41598-021-99338-1), 2021-10-06
Supplement: 41598_2021_99338_MOESM1_ESM.pdf [file 41598_2021_99338_MOESM1_ESM.pdf]

## **Supplementary Information**

### **Generation of knock-in lampreys by CRISPR-Cas9-mediated genome engineering**

Daichi G. Suzuki<sup>1,2</sup>, Hiroshi Wada<sup>2</sup>, Shin-ichi Higashijima<sup>1,3</sup>

1. Exploratory Research Center on Life and Living Systems (ExCELLS), National Institutes of Natural Sciences, 5-1 Higashiyama, Myodaiji-cho, Okazaki, Aichi 444-8787, Japan.

2. Faculty of Life and Environmental Sciences, University of Tsukuba, Tsukuba 305-8572, Japan.

3. National Institute for Basic Biology, National Institutes of Natural Sciences, 5-1 Higashiyama, Myodaiji-cho, Okazaki, Aichi 444-8787, Japan.

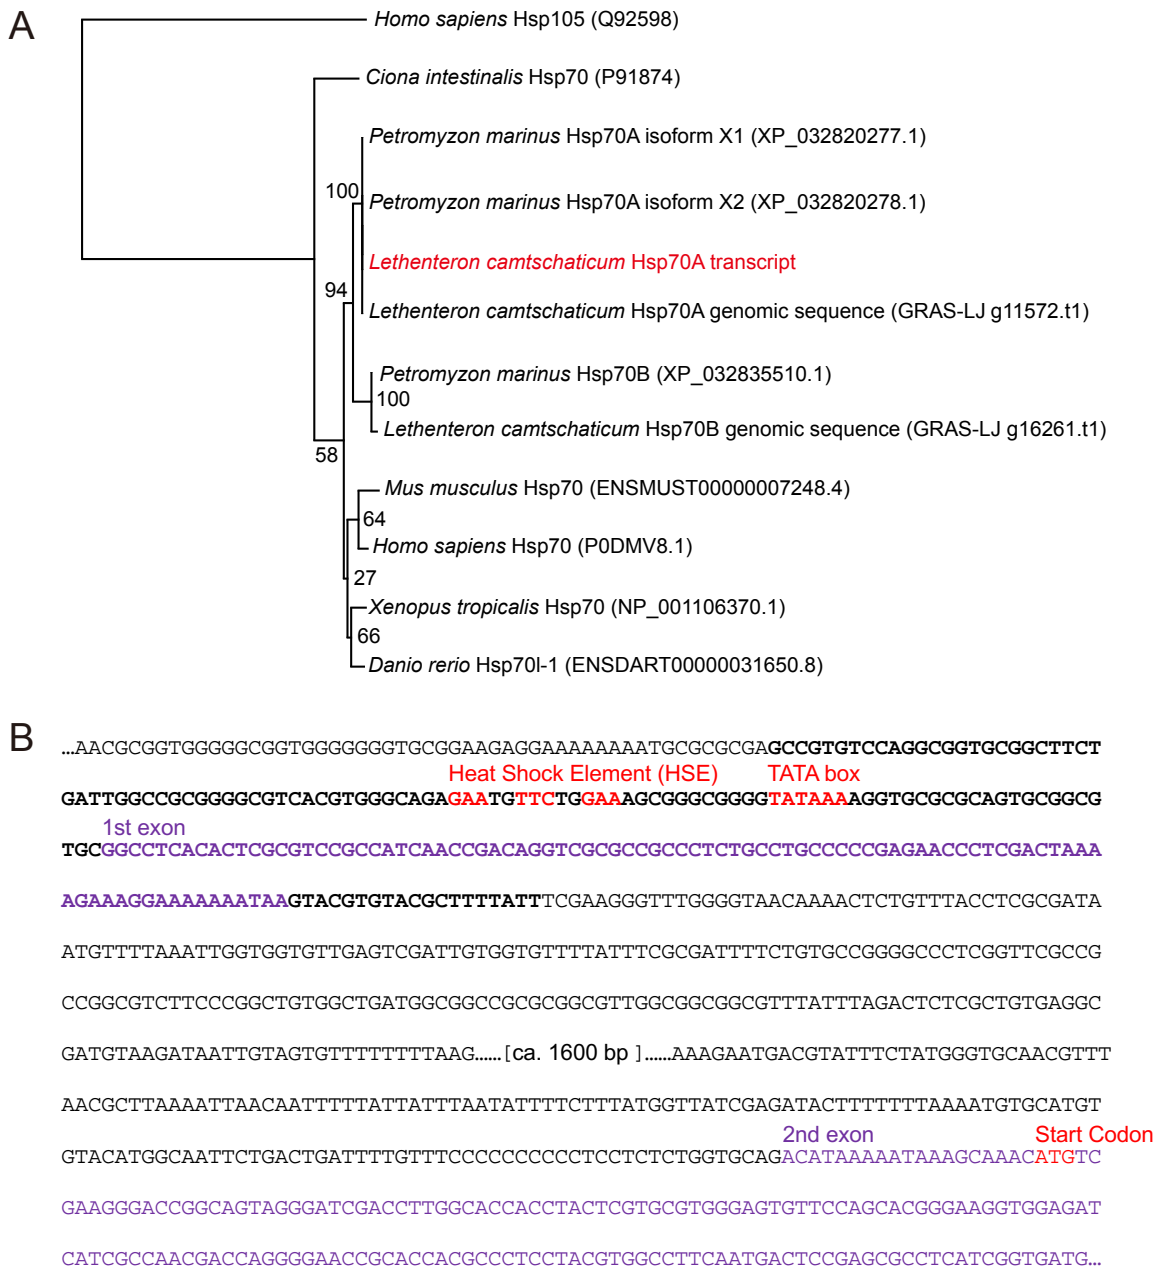

**Figure S1. Identification of lamprey heat shock protein 70-like sequences and isolation of *LcHsp70A* promoter region.**

(A) Molecular phylogenetic tree for Hsp70 amino acid sequences. The tree was constructed using the ML method. The numbers at the nodes represent bootstrap values.

(B) A partial genomic sequence encoding *LcHsp70A* gene. The sequence isolated as a minimal promoter is shown in bold. Exons and characteristic regions (the heat shock element, TATA box, and start codon) are shown in blue and red, respectively.

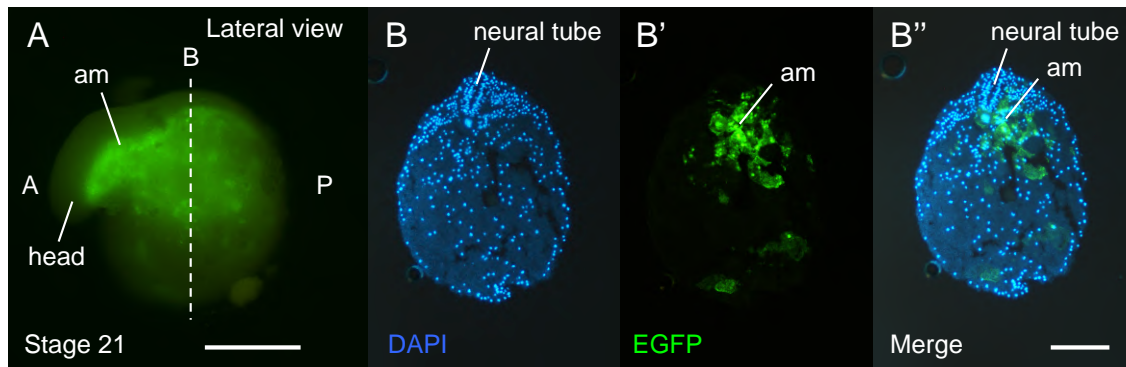

**Figure S2. Histological analysis on *Bra*:EGFP transgenic lampreys generated by microinjection of *Bra*-sg1.**

(A) At stage 21, in lateral view. EGFP is expressed in the axial mesodermal cells (am). The section plane is indicated by a dashed line. A and P indicate anterior and posterior, respectively. Scale bar: 500  $\mu$ m. (B) Transverse section of the specimen shown in (A), counterstained with DAPI. Scale bar: 200  $\mu$ m.

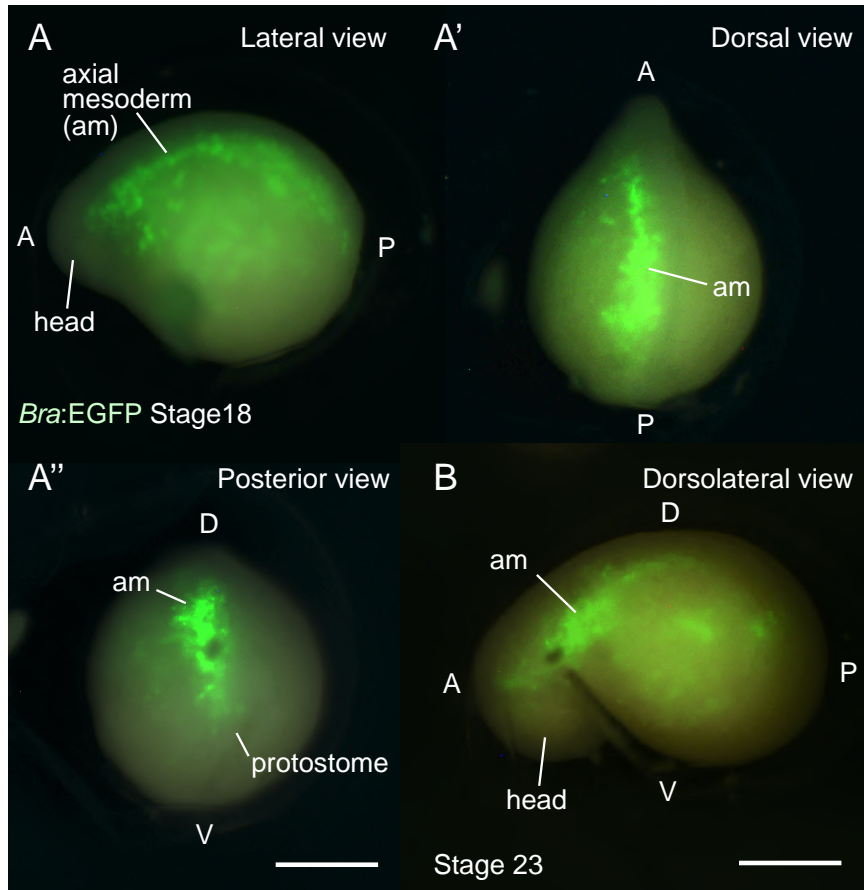

**Figure S3. *Bra:EGFP* transgenic lampreys generated by microinjection of *Bra-sg2*.**

(A) At stage 18, in lateral view (A), dorsal view (A'), and posterior view (A''). EGFP is expressed in the axial mesodermal cells (am). A, D, P, V indicate anterior, dorsal, posterior, and ventral, respectively. Scale bar: 500  $\mu\text{m}$ . (B) At stage 23, in dorsolateral view. EGFP remains expressed in axial mesodermal cells (am). A, D, P, V indicate anterior, dorsal, posterior, and ventral, respectively. Scale bar: 500  $\mu\text{m}$ .

A

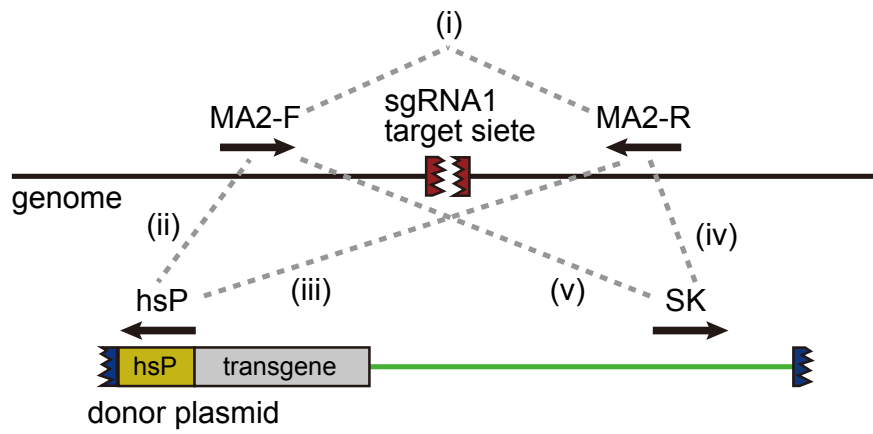

B

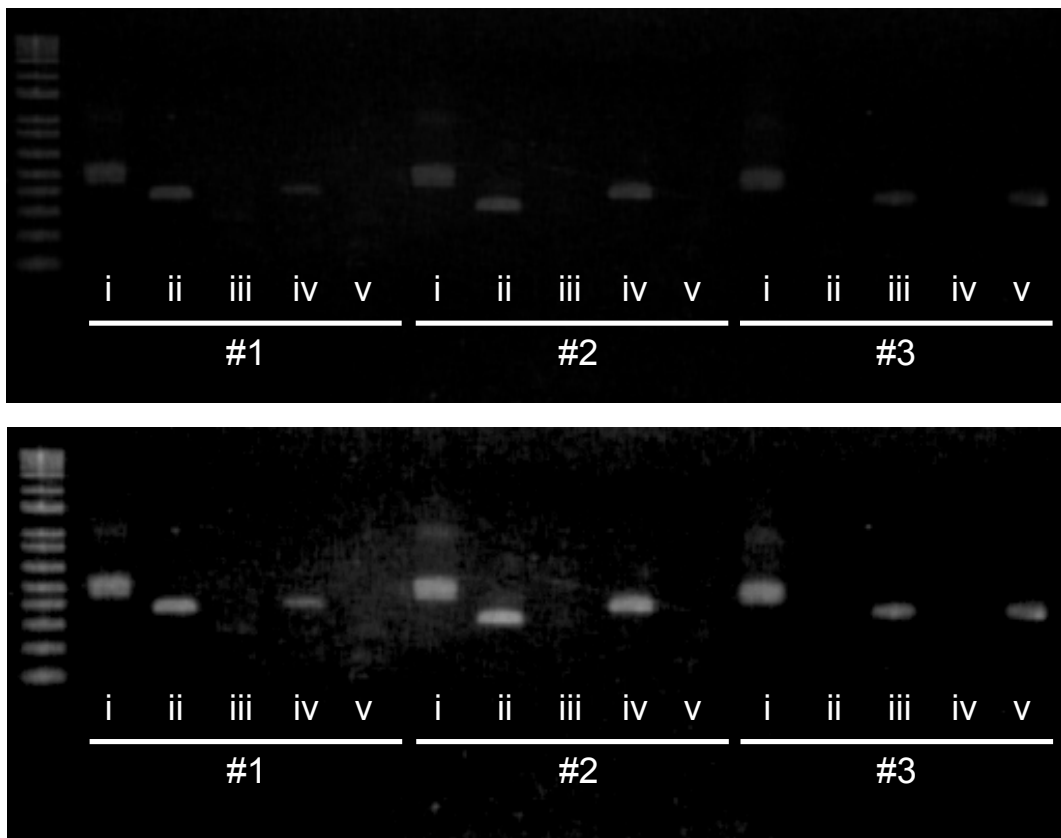

C

5' side, forward integration

|            |                                                                   |
|------------|-------------------------------------------------------------------|
|            | <b>hsP</b>                                                        |
| MA2 : EGFP | TGTGGCCCCGAG <b>AAGTCGCGCGAGCCGTGTCCAGGCGGTGCGGCTTCTGATTGGCCG</b> |
| WT         | TGTGGCCCCGAGA-----                                                |

3' side, forward integration

|            |                                                                   |
|------------|-------------------------------------------------------------------|
|            | <b>Tbait (partial)</b>                                            |
| MA2 : EGFP | GCGGCCG <b>GGCTGCT</b> GAGGGGGTGTGGGAAGATACAGCTGGGTTTGGGAACGAGGTG |
| WT         | -----GAGGGGGTGTGGGAAGATACAGCTGGGTTTGGGAACGAGGTG                   |

**Figure S4. Insertion mapping and sequence analysis of the *MA2*:EGFP knock-in lampreys.**

(A) Primer design for the insertion mapping. Four primers are designed to determine insertion directions in *MA2*:EGFP knock-in lampreys; forward (MA2-F, ATACATAGAACAAGCAAGGGGACCTCT) and reverse (MA2-R, GTTGACCGCCGGGGTCCAGGTTTATA) primers for the *MA2* coding genomic region, and two primers, for hsP (hsP: TTCGAAATAAAAGCGTACACGTA) and SK (SK: GATTCATTAATGCAGCTGGCACGACAG) regions of the donor plasmid, respectively. Combinations of the primers for genomic PCR analysis are indicated as (i)–(v).

(B) Genomic PCR analysis using each primer combination described in (A). The result for three *MA2*:EGFP knock-in lampreys (#1–#3) are shown. Top: original data. Bottom: contrast adjusted. The blots are not cropped from different parts of the same gel, or from different gels, fields, or exposures.

(C) DNA sequences of the joint region of the insertions for the *MA2*:EGFP knock-in lamprey. The PCR products of the insertion mapping (#1-ii and #1-iv) were sequenced and aligned with the upstream region of the *MA2* gene in the *L. camtschaticum* genome.

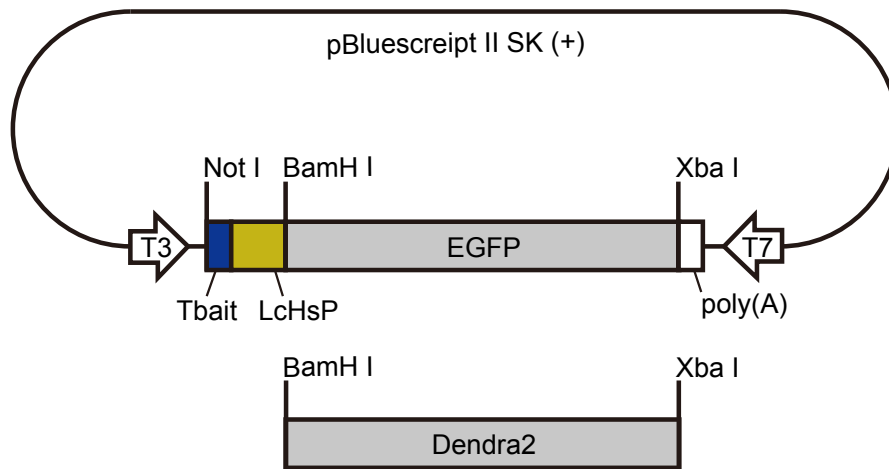

**Figure S5. Plasmid design.** For Tbait-LcHsP-EGFP) synthesis, pBluescript II SK(+) was used as a backbone. The plasmid contains Tbait, a heat shock promoter region of *L. camtschaticum*, and EGFP. These components are replaceable to other sequences by restriction enzyme digestion and re-ligation.

| Accession number | Scaffold or contig number | Position | Sequence                | Direction | Number of mismatches |
|------------------|---------------------------|----------|-------------------------|-----------|----------------------|
| KE993819.1       | scaffold00148             | 988691   | cGCTGCTGAcAGGGAGCTCtTGG | -         | 3                    |
| KE993686.1       | scaffold00015             | 1618081  | GGCgGCcGTCAaGGcGCTCATGG | +         | 4                    |
| KE993686.1       | scaffold00015             | 2143733  | GGtTGCTGTCAGtGtGgTCATGG | -         | 4                    |
| KE993688.1       | scaffold00017             | 1501398  | GGCTGCTGTtAGcGAGCgCcTGG | -         | 4                    |
| KE993694.1       | scaffold00023             | 1341836  | tGgTGCTGTCAGGGAGCgCAaGG | +         | 4                    |
| KE993720.1       | scaffold00049             | 1997053  | GcCTGaTcTCtGGGAGCTCATGG | +         | 4                    |
| KE993729.1       | scaffold00058             | 2250841  | aaCTcCTGTCAGGGAGtTCATGG | -         | 4                    |
| KE993730.1       | scaffold00059             | 1303898  | GGCTGCTGTtAtcGAGCTCgTGG | +         | 4                    |
| KE993806.1       | scaffold00135             | 430752   | tGCTGCTGTCcGGGgGgTCATGG | -         | 4                    |
| KE993823.1       | scaffold00152             | 601079   | GGCTGCTGgCAGGGAGCTtcgGG | +         | 4                    |
| KE993860.1       | scaffold00189             | 388288   | GGCTGCTGcCAGGGAGCagAgGG | -         | 4                    |
| KE993926.1       | scaffold00255             | 613780   | GcCTGCcaTCAGGGAGtTCATGG | +         | 4                    |
| KE993938.1       | scaffold00267             | 638955   | GGCTcCTGTAgGGGAcCTCATGG | -         | 4                    |
| KE993978.1       | scaffold00307             | 483562   | GGtTtTGTaAGGGAGCTCATGG  | +         | 4                    |
| KE994039.1       | scaffold00368             | 213088   | cGCTGCTGgCAGGGAGgTCAcGG | -         | 4                    |
| KE994043.1       | scaffold00372             | 13980    | GGCaGcGtCtGGGAGCTCtTGG  | +         | 4                    |
| KE994099.1       | scaffold00428             | 359739   | GGCTGCTGAcAaGGAGgTCAcGG | -         | 4                    |
| KE994105.1       | scaffold00434             | 282568   | GGCTGCTGTgAGGacGCTCAaGG | -         | 4                    |
| KE994367.1       | scaffold00696             | 145491   | GGCTGCTcTCAGaGAGgTCAcGG | -         | 4                    |
| KE994863.1       | scaffold01192             | 78188    | GGCTGCTGTgAGGacGCTCAaGG | +         | 4                    |
| KE995000.1       | scaffold01329             | 10548    | GGCaGcGtCtGGGAGCTCtTGG  | +         | 4                    |
| APJL01113700.1   | contig086823              | 1201     | GGCaGcGtCtGGGAGCTCtTGG  | -         | 4                    |
| APJL01114005.1   | contig087430              | 2163     | tGgTGCTGTCAGGGAGCgCAaGG | +         | 4                    |
| APJL01118947.1   | contig112041              | 1501     | GGCaGcGtCtGGGAGCTCtTGG  | -         | 4                    |
| APJL01128773.1   | contig112041              | 726      | GGCTGCTGAcAaGGAGgTCAcGG | -         | 4                    |
| APJL01148468.1   | contig138789              | 442      | GGCgGCTGAcAtGGAGCaCATGG | -         | 4                    |
| APJL01159461.1   | contig152146              | 505      | cGCTGCTGgCAGGGgGCTCAcGG | +         | 4                    |

**Table S1. DNA sequences for sgRNAs against *L. camtschaticum* genomic sequences.**

One sequence showed three mismatches and a conserved PAM sequence (5'-NGG) and

26 sequences four mismatches and a conserved PAM sequence compared to the sgT

sequence. Mismatches are shown in lowercase letters.



|                   |                          |               |
|-------------------|--------------------------|---------------|
| <i>Bra</i> -sg1   | GAATTCCGTACGCGGTGGAAGG   | (-435 ~ -414) |
| <i>Bra</i> -sg2   | GAGTGGATGTGCCTGTACA GGG  | (-468 ~ -446) |
| <i>MA2</i> -sg1   | GGGGGCGGAGAGTTGGTAGT TGG | (-232 ~ -210) |
| <i>SoxE3</i> -sg1 | GGGCGAGGGAGTAAGAGGCG GGG | (-419 ~ -397) |

**Table S2. DNA sequences for the corresponding sgRNAs.**

PAM sequences (5'-NGG) are labeled in red. The numerals shown at the right indicate the locations of the corresponding sequences with respect to the prospective transcription start sites (the 5' end of the longest cDNA) for each gene.

| target       | reporter gene | sgRNA | check stage | positive | survivor | positive/survivor | dead | total injection |
|--------------|---------------|-------|-------------|----------|----------|-------------------|------|-----------------|
| <i>Bra</i>   | EGFP          | sg1   | 16          | 37       | 108      | 34.26%            | 241  | 349             |
| <i>Bra</i>   | EGFP          | sg2   | 16          | 25       | 110      | 22.73%            | 245  | 355             |
| <i>MA2</i>   | EGFP          | sg1   | 26          | 25       | 119      | 21.01%            | 361  | 386             |
| <i>SoxE3</i> | Dendra2       | sg1   | 21          | 18       | 59       | 30.51%            | 307  | 366             |

**Table S3. Efficiency of CRISPR-Cas9-mediated knock-in.**

|                                | positive | survivor | positive/survivor | dead | survival rate<br>(survivor/total) | total injection |
|--------------------------------|----------|----------|-------------------|------|-----------------------------------|-----------------|
| sgRNA1 + sgRNA2 + Cas9 mRNA    | 11       | 42       | 26.2%             | 158  | 21.0%                             | 200             |
| sgRNA1 + sgRNA2 + Cas9 protein | 7        | 40       | 17.5%             | 160  | 20.0%                             | 200             |
| sgRNA2 + Cas9 mRNA (no sgRNA1) | N/A      | 37       | N/A               | 163  | 18.5%                             | 200             |
| Water only                     | N/A      | 57       | N/A               | 143  | 28.5%                             | 200             |
| No injection                   | N/A      | 181      | N/A               | 19   | 90.5%                             | 200             |

sgRNA1: *Bra* sg1

N/A: not applicable

**Table S4. Control experiments for CRISPR-Cas9-mediated knock-in.**
